# Supplementary material
Source: Springer Nature journal article supplement (https://www.springermedizin.de/resource/supplementary/12913_2009_1278_MOESM1_ESM.pdf/9527758)
Supplement: MOESM1 [file 9527758]

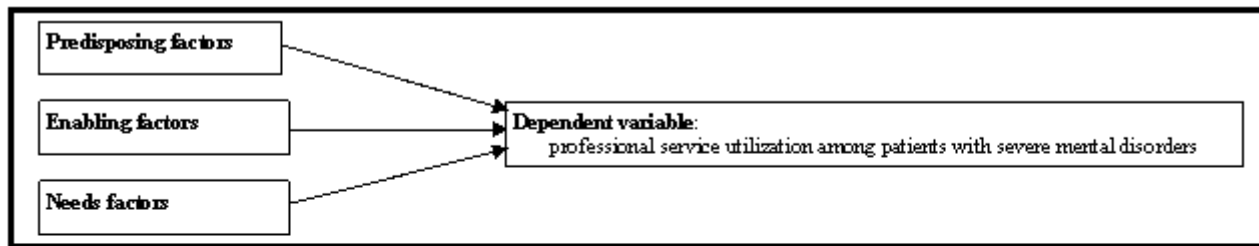

## Variables included in the analysis

### Independent variables

#### Predisposing factors

- Age
  - Gender
  - Marital status
  - Education
- Importance of service accessibility as regards:
    - opening hours
    - waiting times for help
    - geographical proximity
    - number of health and social resources familiar to the patient

#### Enabling factors

- Work
  - Income sources
  - Housing type and location
  - Compliance with medication
  - Presence or absence of contact with relatives
  - Duration of follow-up with psychiatrist, general practitioner (GP) or case manager
- Amount of help for needs received from relatives or services
  - Proportion of needs receiving adequate help
  - Satisfaction with service accessibility as regards:
    - opening hours
    - waiting time for help
    - geographical proximity
    - quantity and diversity of available services
    - ease of accessing psychiatrist, GP or case manager

#### Needs factors

- First diagnosis
  - Second diagnosis
  - Suicide attempts
  - Alcoholism or drug addiction
  - History of psychiatric disorders in the family
- Violence
  - Criminal record
  - Number of needs, serious needs and health needs
  - Percentage of serious needs out of total needs and health needs out of total needs

### Dependent variables (DV: professional service utilization among patients with severe mental disorders)

- Frequency of consultation with psychiatrist, GP, case manager, respectively (Tables 2, 3, 4)
- Frequent users of one professional only, two professionals, or three professionals compared with users of zero professional services (or no users or infrequent users - reference group; Tables 5 and 6)
